# Supplementary material for: Development and Identification of Four New Synthetic Hexaploid Wheat Lines with Solid Stems
Source: Research Square preprint supplement (doi:10.21203/rs.3.rs-729669/v1), 2021-07-27

**Supplementary Information**

Supplementary Figure S1-FISH identification of Syn-SAU-117 and its parent. a: FISH karyotypes of the A, B, and D genomes in Syn-SAU-117 and its parents; b: Ma; c: Syn-SAU-117; d: AS92.

Supplementary Figure S2-FISH identification of Syn-SAU-118 and its parent. a: FISH karyotypes of the A, B, and D genomes in Syn-SAU-118 and its parents; b: Ma; c: Syn-SAU-118; d: AS95.

Supplementary Figure S3-FISH identification of Syn-SAU-119 and its parent. a: FISH karyotypes of the A, B, and D genomes in Syn-SAU-119 and its parents; b: Ma; c: Syn-SAU-119; d: AS96.

**Figure S1**


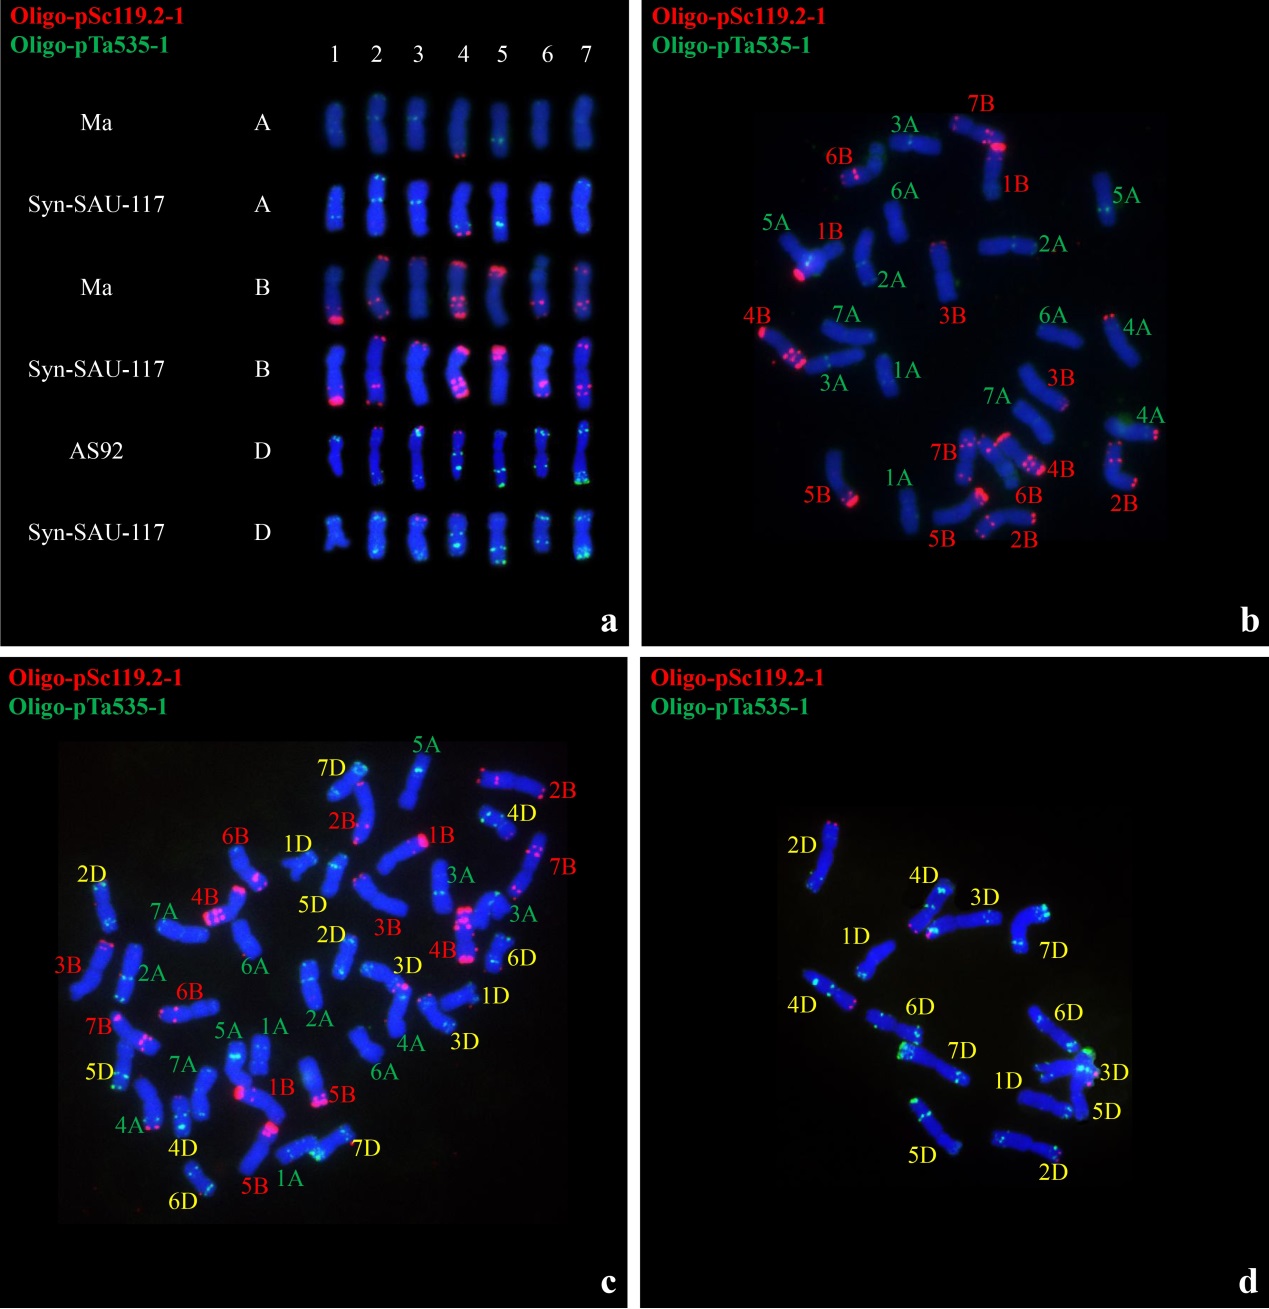


**Figure S2**


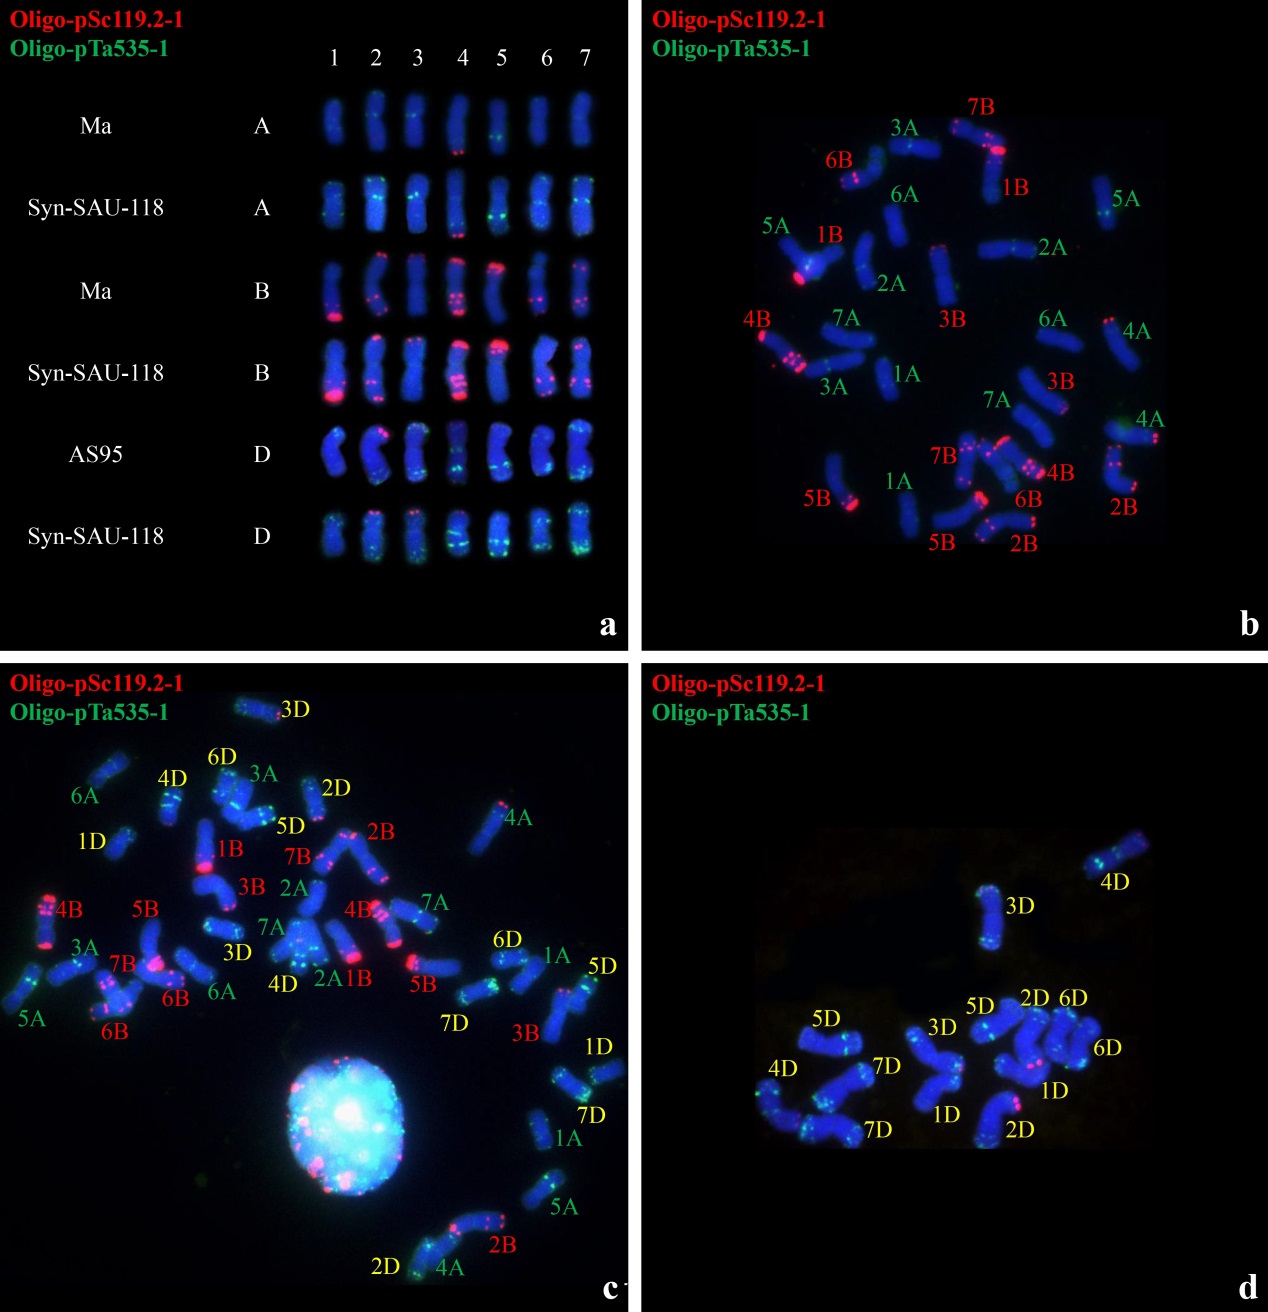


**Figure S3**


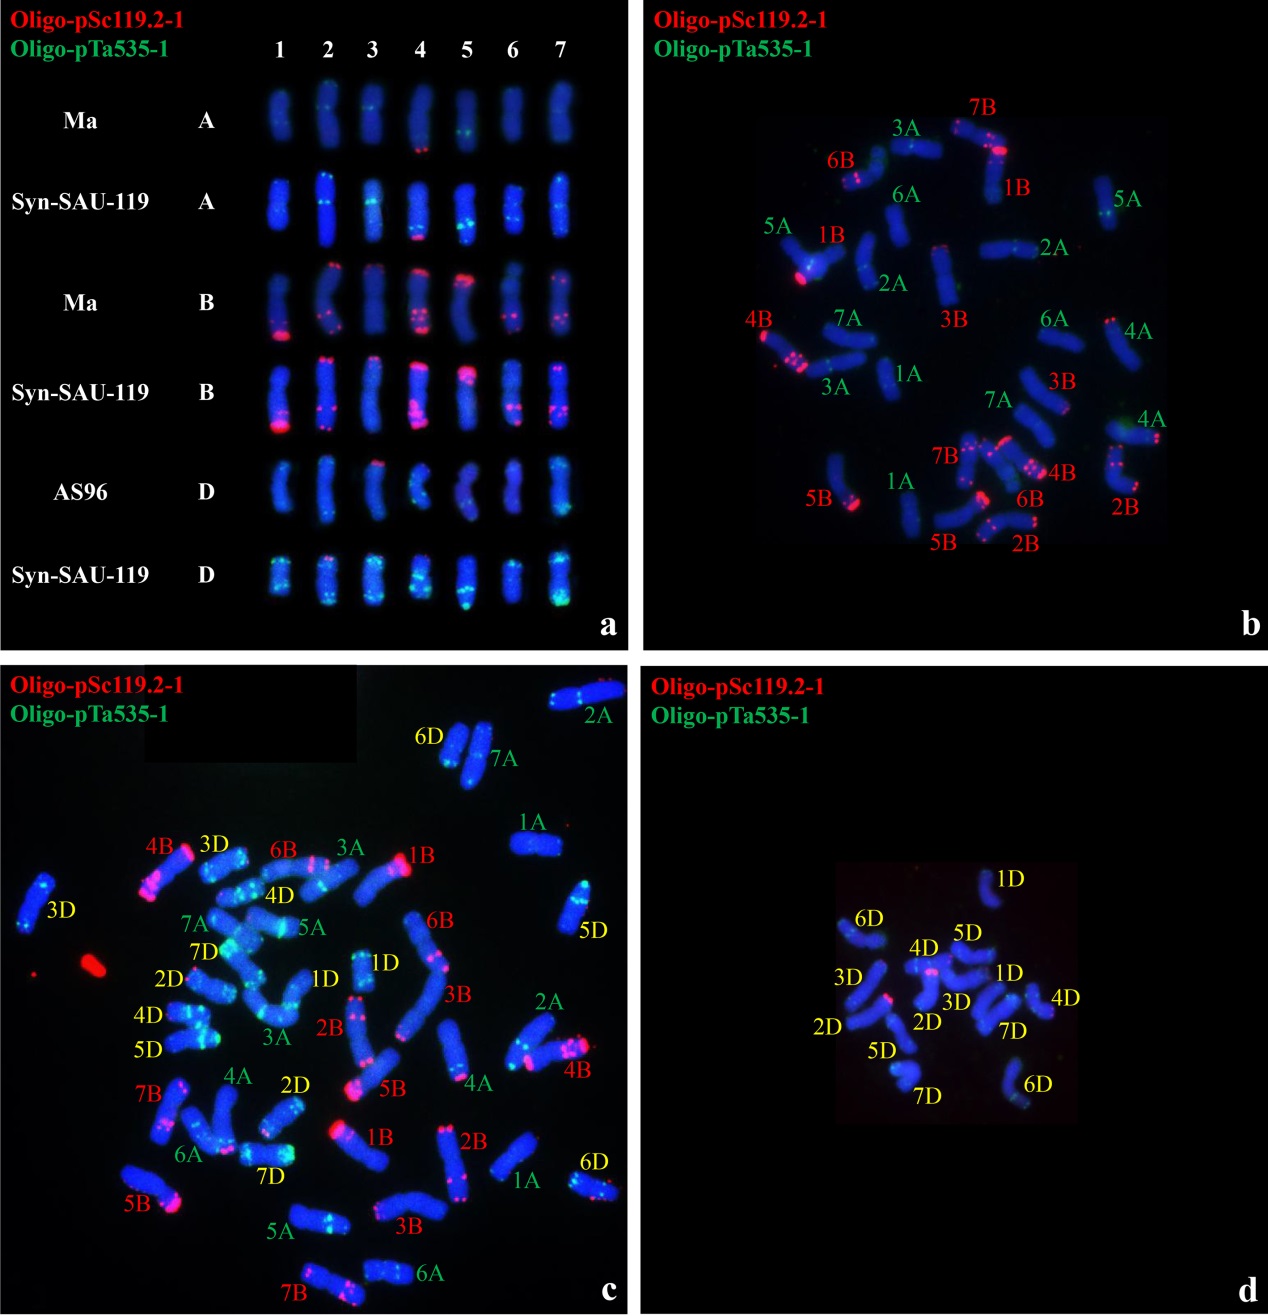

Supplement: Supplementary file 1 [file 80b24e93ca784d5c646ceb2c.docx]
